# Supplementary material for: Growth control of the eukaryote cell: a systems biology study in yeast
Source: PubMed Central journal article supplement (PMC2373899; doi:10.1186/jbiol54), 2007-04-30
Supplement: jbiol54-S6.pdf [file jbiol54-S6.pdf]

## **Additional document 6**

### **Proteome – transcriptome correlations**

---

**Proteome – transcriptome correlations**  
(relative changes from 0.1 to 0.2 h<sup>-1</sup>)

(Log<sub>2</sub>-Log<sub>2</sub> scale)

## Proteome vs. transcriptome correlation

### Carbon limitation

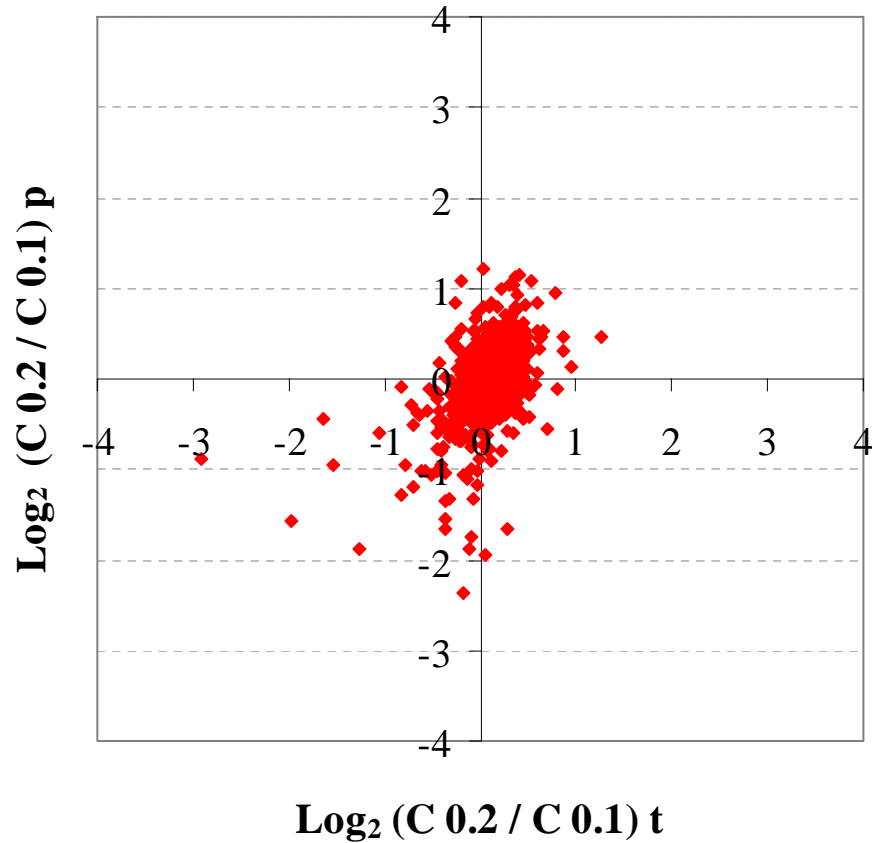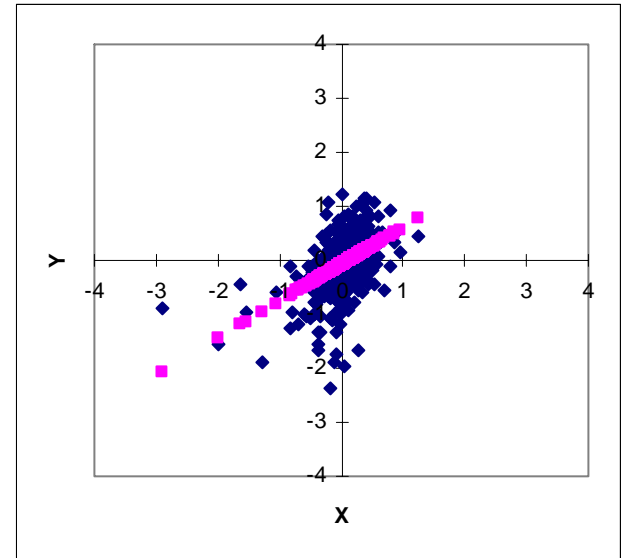

### Linear Regression

$$Y = A + B * X$$

| Parameter | Value    | Error   |
|-----------|----------|---------|
| A         | -0.08494 | 0.01531 |
| B         | 0.6785   | 0.04826 |

| R       | SD      | N   | P       |
|---------|---------|-----|---------|
| 0.47514 | 0.38984 | 680 | <0.0001 |

**Proteome vs. transcriptome correlation**  
**Nitrogen limitation**

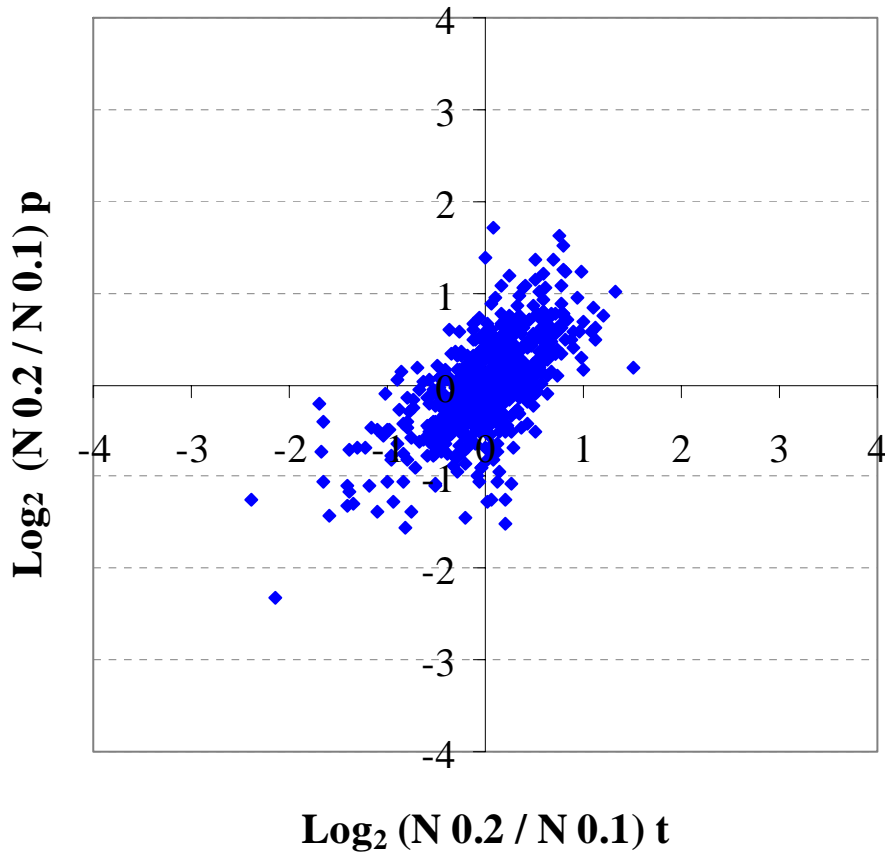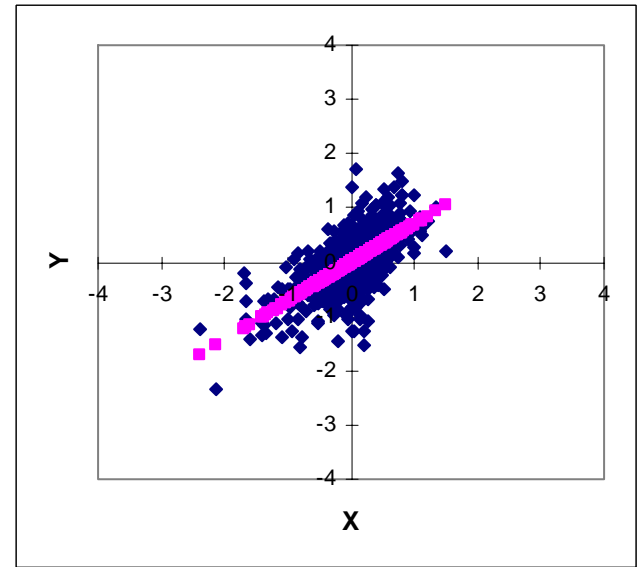

**Linear Regression**  
 $Y = A + B * X$

| Parameter | Value    | Error   |
|-----------|----------|---------|
| A         | -0.01989 | 0.01496 |
| B         | 0.71071  | 0.03167 |

  

| R       | SD      | N   | P       |
|---------|---------|-----|---------|
| 0.65283 | 0.39005 | 680 | <0.0001 |

**Proteome vs. transcriptome correlation**  
**Phosphate limitation**

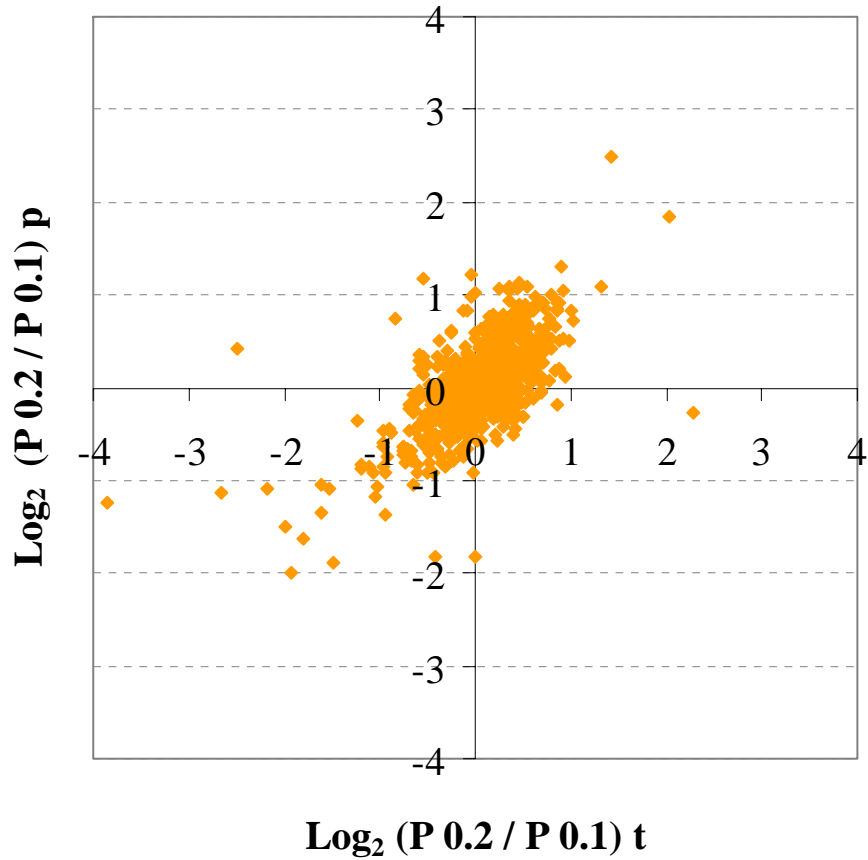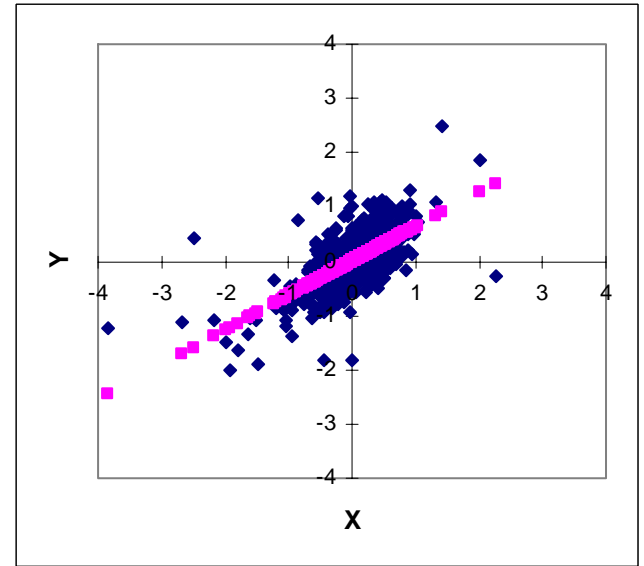

**Linear Regression**  
 $Y = A + B * X$

| Parameter | Value    | Error   |
|-----------|----------|---------|
| A         | -0.00798 | 0.0128  |
| B         | 0.63345  | 0.02645 |

| R       | SD      | N   | P       |
|---------|---------|-----|---------|
| 0.65166 | 0.35578 | 779 | <0.0001 |

## Proteome vs. transcriptome correlation

### Sulphate limitation

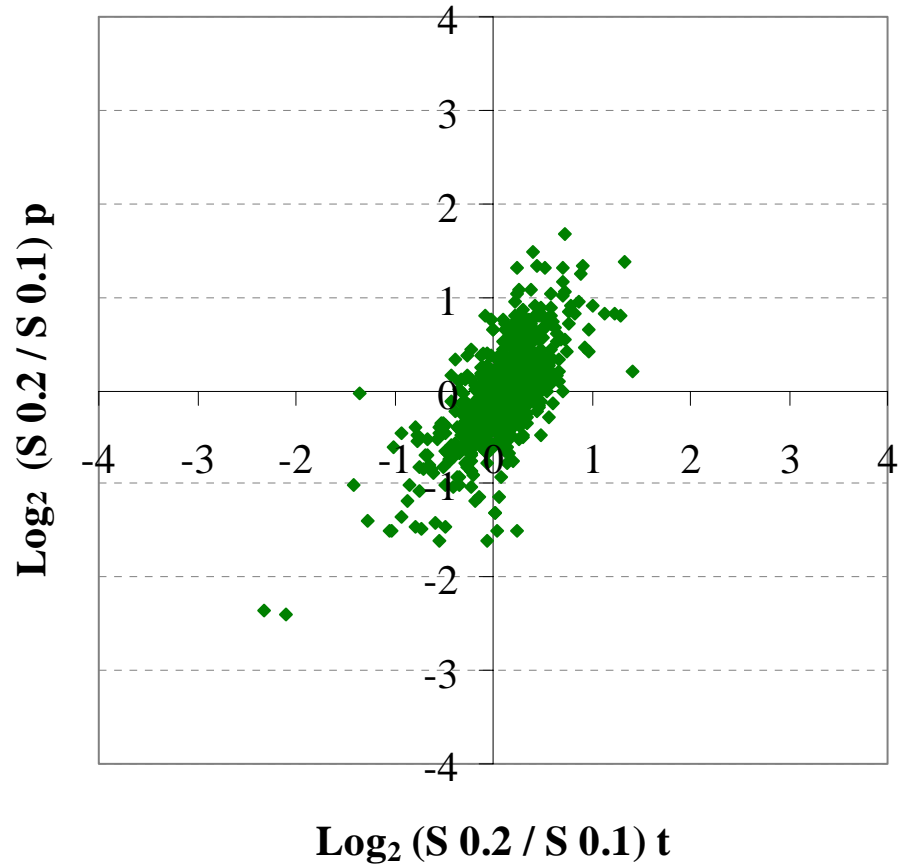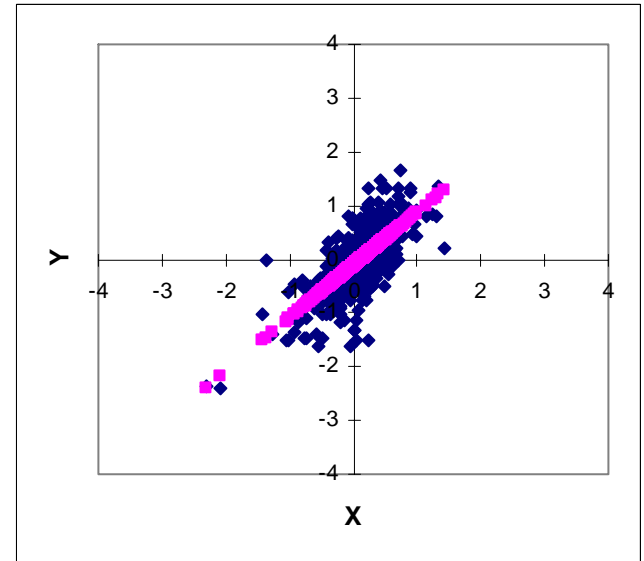

### Linear Regression

$$Y = A + B * X$$

| Parameter | Value    | Error   |
|-----------|----------|---------|
| A         | -0.12263 | 0.01505 |
| B         | 0.98346  | 0.03824 |

| R       | SD      | N   | P       |
|---------|---------|-----|---------|
| 0.70829 | 0.37444 | 659 | <0.0001 |

**Proteome – transcriptome correlations**  
(relative changes from 0.1 to 0.2 h<sup>-1</sup>)  
(natural values)

Graphs and linear regression analysis

## Proteome vs. transcriptome correlation

### Carbon limitation

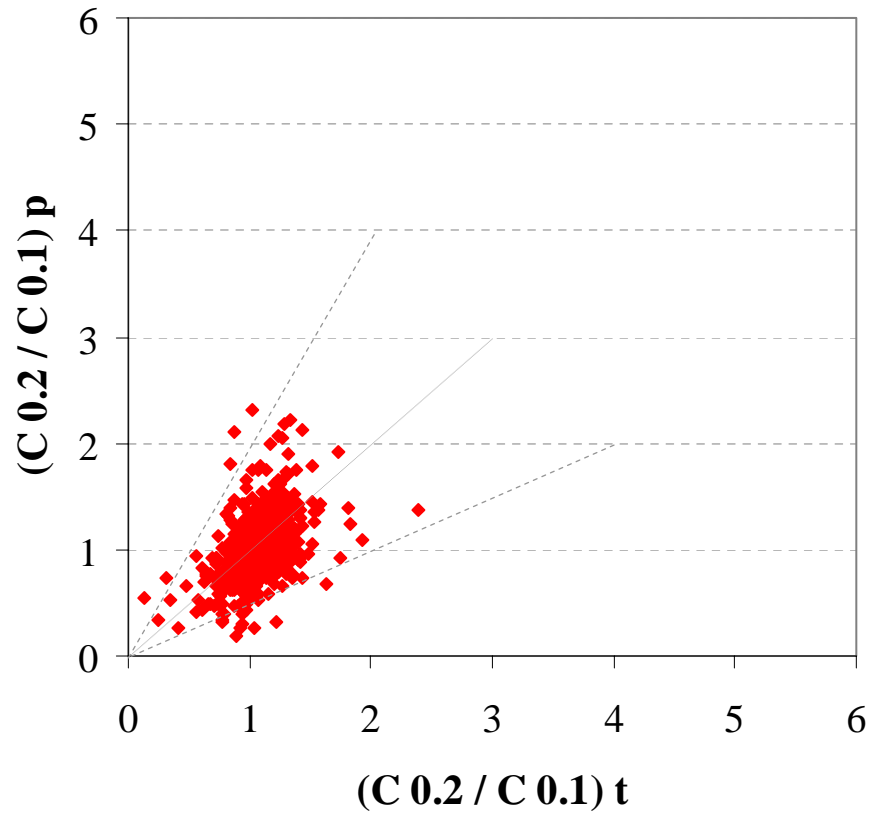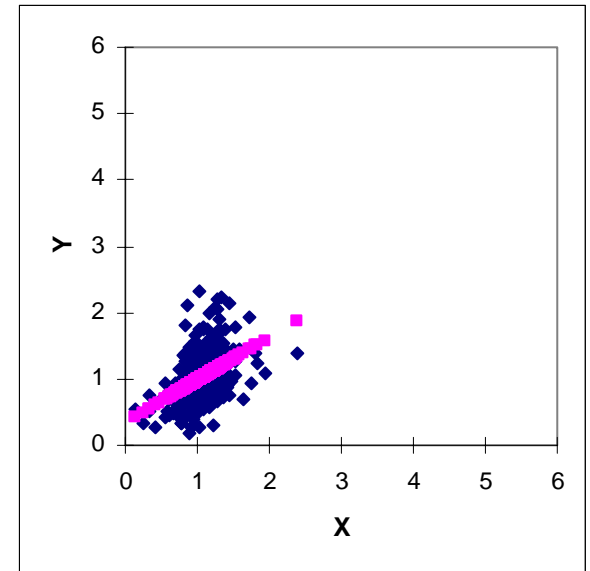

### Linear Regression

$$Y = A + B * X$$

| Parameter | Value   | Error   |
|-----------|---------|---------|
| A         | 0.33048 | 0.05403 |
| B         | 0.64153 | 0.0496  |

---

| R       | SD      | N   | P       |
|---------|---------|-----|---------|
| 0.44485 | 0.26168 | 680 | <0.0001 |

**Proteome vs. transcriptome correlation**  
**Nitrogen limitation**

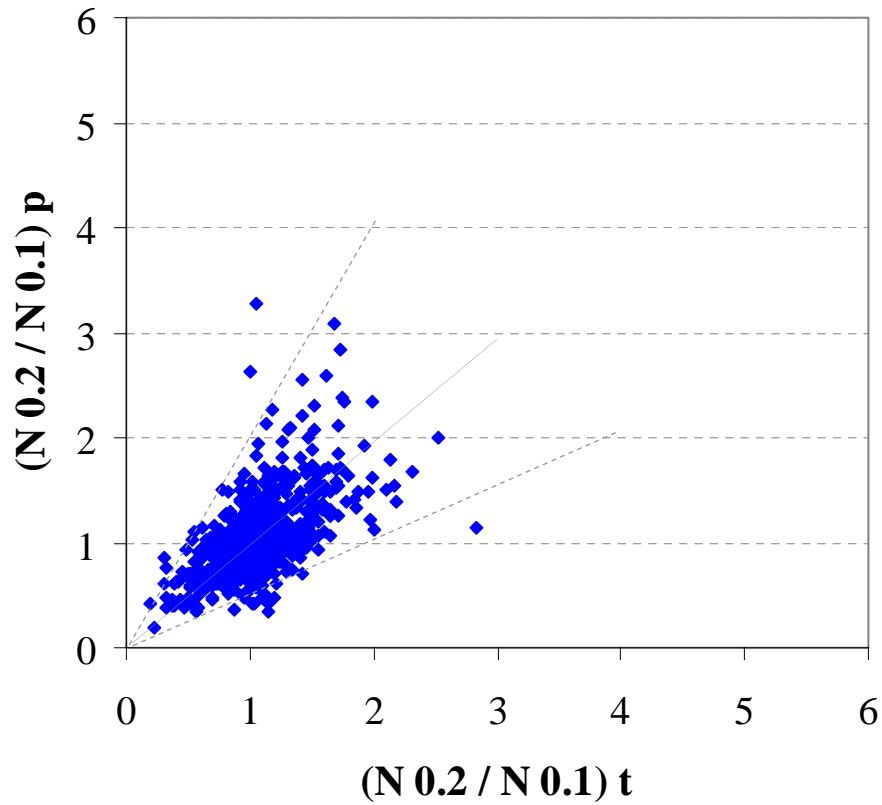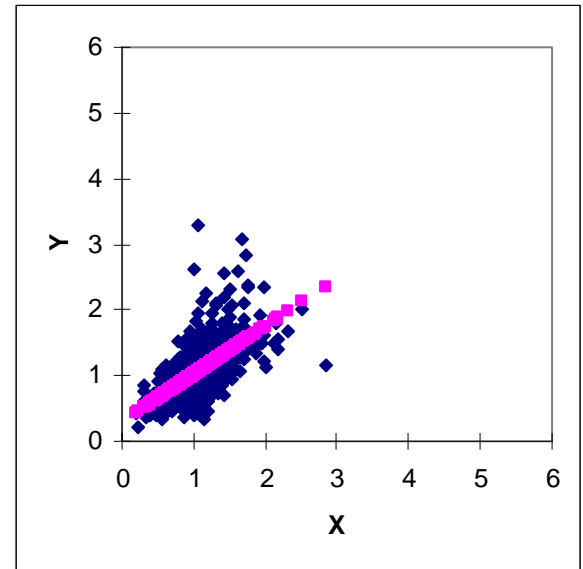

**Linear Regression**  
 $Y = A + B * X$

| Parameter | Value   | Error   |
|-----------|---------|---------|
| A         | 0.28149 | 0.03955 |
| B         | 0.73136 | 0.0358  |

  

| R       | SD      | N   | P       |
|---------|---------|-----|---------|
| 0.61726 | 0.30703 | 680 | <0.0001 |



**Proteome vs. transcriptome correlation**  
**Phosphate limitation**

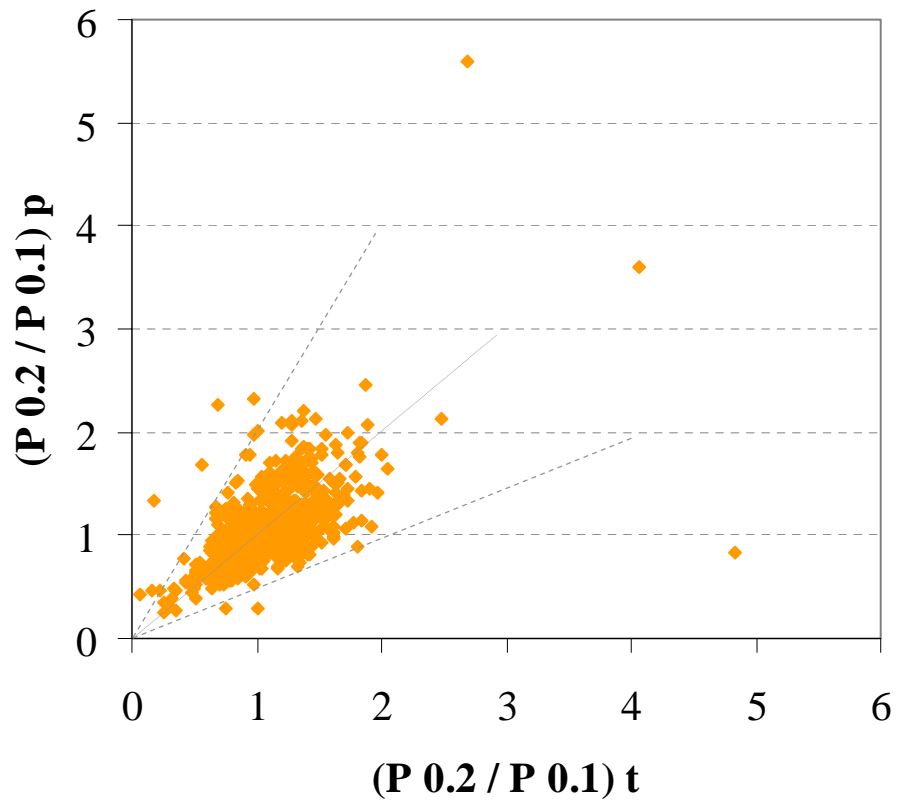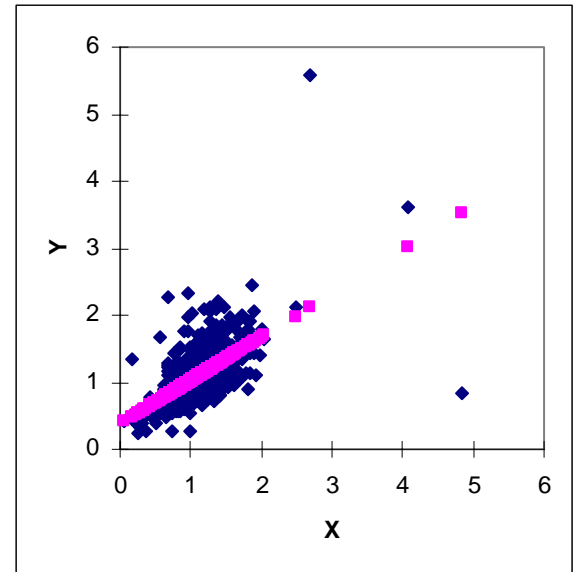

**Linear Regression**  
 $Y = A + B * X$

| Parameter | Value   | Error   |
|-----------|---------|---------|
| A         | 0.364   | 0.03556 |
| B         | 0.65049 | 0.03125 |

  

| R       | SD     | N   | P       |
|---------|--------|-----|---------|
| 0.59839 | 0.3045 | 779 | <0.0001 |

## Proteome vs. transcriptome correlation

### Sulphate limitation

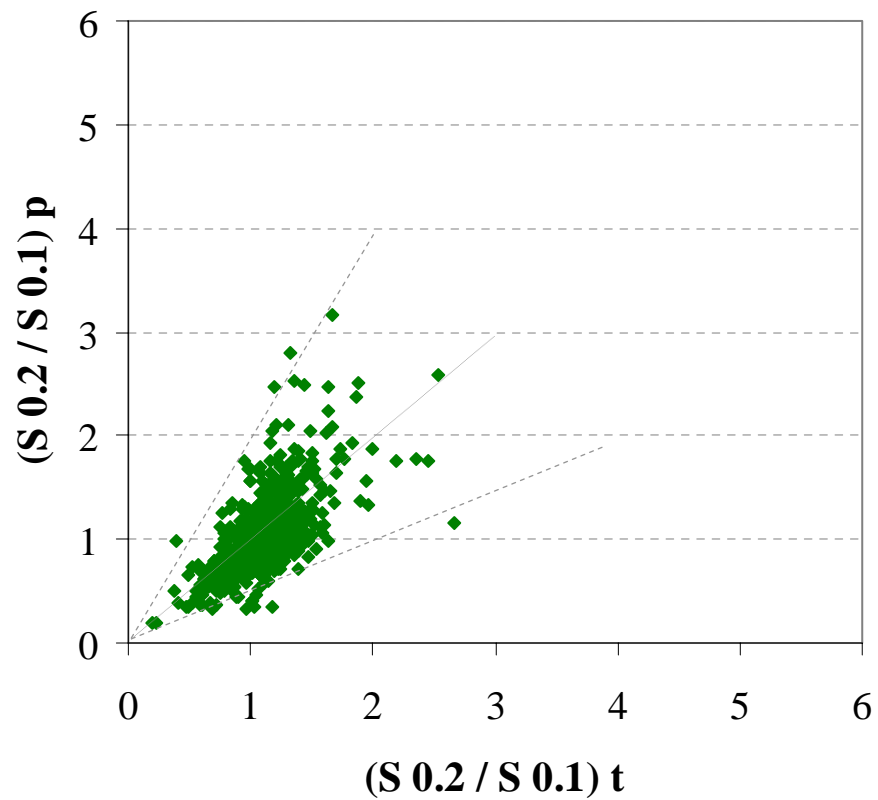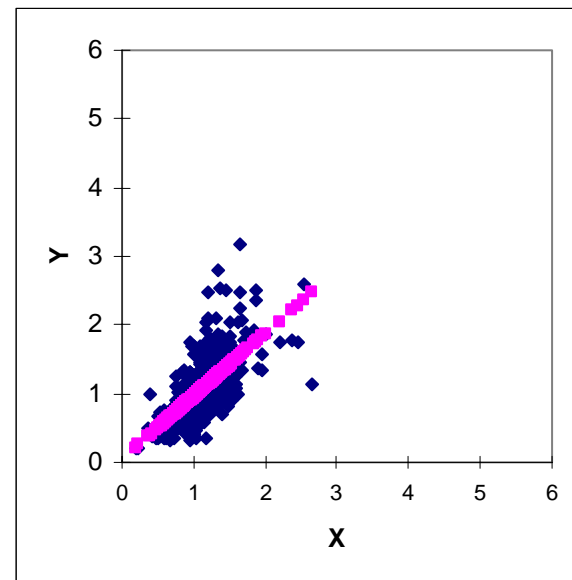

### Linear Regression

$$Y = A + B * X$$

| Parameter | Value | Error |
|-----------|-------|-------|
|-----------|-------|-------|

|   |         |         |
|---|---------|---------|
| A | 0.03376 | 0.04614 |
| B | 0.91729 | 0.04048 |

| R       | SD     | N   | P       |
|---------|--------|-----|---------|
| 0.66237 | 0.2903 | 659 | <0.0001 |
